# Supplementary material for: TREML2 Gene Expression and Its Missense Variant rs3747742 Associate with White Matter Hyperintensity Volume and Alzheimer’s Disease-Related Brain Atrophy in the General Population
Source: MDPI journal article supplement (doi:10.3390/ijms232213764), 2022-11-09
Supplement: s1 [file s1]

## Supplement

**Original manuscript title:** *TREML2* gene expression and its missense variant rs3747742 associate with white matter hyperintensity volume and Alzheimer's disease-related brain atrophy in the general population

**Authors:** A. Luise Kühn, Stefan Frenzel, Alexander Teumer, Katharina Wittfeld, Linda Garvert, Antoine Weihs, Georg Homuth, Holger Prokisch, Robin Bülow, Matthias Nauck, Uwe Völker, Henry Völzke, Hans J. Grabe, Sandra Van der Auwera

**Corresponding author:** A. Luise Kühn, Sandra Van der Auwera

### Supplementary methods: Variable description

**alcohol intake** – self reported alcohol intake during the last 30 days (ethanol in grams/day) [1]

**education** – years of education derived from the highest school degree and the highest professional degree; those participants without a finished degree were set to eight years as this was the minimal number that any other participant had stated (years)

**hypertension** – participant does not have hypertension if systolic blood pressure is below 140 and diastolic blood pressure is below 90 and he/she did not get a prescription for anti-hypertensives during the last year by a physician (according to ISH-WHO 1999); in all other cases the participant has hypertension (yes/no)

**income** – self reported sum of incomes in the household divided by the square root of the number of people living in the household (Euro)

**partner status** – currently living in a partnership (yes/no)

**serum total/hdl cholesterol ratio** – ratio between total serum cholesterol and HDL (high-density lipoprotein) serum cholesterol

**smoking status** – smoking status (never, ex, current)

### Supplementary tables

All base models were adjusted for age (years), sex, age\*sex. If they contained gene expression data, they were also adjusted for white blood cells (wbc, Gpt/l), red blood cells (rbc, Tpt/l), platelets (plt, Gpt/l), neutrophils (%), monocytes (%), basophils (%), eosinophils (%), RNA integrity number (RIN), RNA amplification batch, and sample storage time (time between blood donation and RNA isolation, days). If they contained the WMH volume or the AD score, they were adjusted for total intracranial volume (ICV, cm<sup>3</sup>). If they contained genetic data, they were adjusted for the genetic batch and the first three genetic principal components.

The socioeconomic model is the base model with additional adjustment for education, income, alcohol intake and partner status. The cardiovascular model is the base model with an additional adjustment for body mass index (BMI), smoking, hypertension, serum total/hdl cholesterol ratio and triglycerides. The full model is the base model with additional adjustment for all socioeconomic and cardiovascular factors.

Supplementary Table S1. The APOE  $\epsilon 4$  status was derived from the SNPs rs429358 and rs7412 according to custom [2].

| rs429358 | rs7412 | description            | APOE $\epsilon 4$ status |
|----------|--------|------------------------|--------------------------|
| CC       | CC     | Apo-e4/e4              | 2                        |
| CC       | CT     | Apo-e1/e4              | 1                        |
| CT       | CC     | Apo-e3/e4              | 1                        |
| CC       | TT     | Apo-e1/e1              | 0                        |
| CT       | TT     | Apo-e1/e2              | 0                        |
| TT       | TT     | Apo-e2/e2              | 0                        |
| TT       | CT     | Apo-e2/e3              | 0                        |
| TT       | CC     | Apo-e3/e3              | 0                        |
| CT       | CT     | Apo-e1/e3 or Apo-e2/e4 | missing                  |

Supplementary Table S2. WMH volume was associated with TREML2 expression (rows 1-4). This relationship was not notably influenced by the APOE  $\epsilon 4$  status (rows 5-6) or the rs3747742 status (rows 8-9) of the participant. We also did not find an interaction effect of TREML2 expression with either APOE  $\epsilon 4$  (row 7) or rs3747742 status (row 10) onto WMH volume.

| White matter hyperintensity volume and TREML2 expression |                                                            |        |              |         |     |
|----------------------------------------------------------|------------------------------------------------------------|--------|--------------|---------|-----|
|                                                          |                                                            | effect | 95% CI       | p-value | N   |
| 1                                                        | base model                                                 | -0.77  | -1.37; -0.17 | 0.012   | 869 |
|                                                          | sensitivity analyses:                                      |        |              |         |     |
| 2                                                        | socioeconomic model                                        | -0.79  | -1.39; -0.19 | 0.0098  | 869 |
| 3                                                        | cardiovascular model                                       | -0.76  | -1.38; -0.15 | 0.015   | 869 |
| 4                                                        | full model                                                 | -0.79  | -1.40; -0.17 | 0.012   | 869 |
|                                                          | the role of APOE $\epsilon 4$ :                            |        |              |         |     |
| 5                                                        | base model with APOE $\epsilon 4$                          | -0.79  | -1.40; -0.18 | 0.012   | 828 |
| 6                                                        | full model with APOE $\epsilon 4$                          | -0.82  | -1.45; -0.19 | 0.011   | 828 |
| 7                                                        | base model with APOE $\epsilon 4$ – expression interaction | 0.61   | -0.47; 1.69  | 0.27    | 828 |
|                                                          | the role of rs3747742:                                     |        |              |         |     |
| 8                                                        | base model with rs3747742                                  | -0.77  | -1.37; -0.16 | 0.013   | 855 |
| 9                                                        | full model with rs3747742                                  | -0.79  | -1.42; -0.17 | 0.013   | 855 |
| 10                                                       | base model with rs3747742 – expression interaction         | 0.29   | -0.49; 1.07  | 0.47    | 855 |

Supplementary Table S3. WMH volume was not significantly associated with either APOE  $\epsilon 4$  (row 1) or rs3747742 (row 2) status.

| White matter hyperintensity volume and genetics |                                      |        |              |         |      |
|-------------------------------------------------|--------------------------------------|--------|--------------|---------|------|
|                                                 |                                      | effect | 95% CI       | p-value | N    |
| 1                                               | base model WMH and APOE $\epsilon 4$ | 0.16   | -0.046; 0.36 | 0.13    | 1886 |
| 2                                               | base model WMH and rs3747742         | -0.082 | -0.23; 0.070 | 0.29    | 1935 |

Supplementary Table S4. The AD score was significantly associated with the missense variant rs3747742 (rows 1-4). This relationship was not notably influenced by the APOE  $\epsilon 4$  status of the participant (rows 5-6). Neither did we find an interaction effect of APOE  $\epsilon 4$  and rs3747742 onto the AD score (row 7).

| AD score and TREML2 missense variant rs3747742 |                                                           |        |             |         |      |
|------------------------------------------------|-----------------------------------------------------------|--------|-------------|---------|------|
|                                                |                                                           | effect | 95% CI      | p-value | N    |
| 1                                              | base model                                                | 0.10   | 0.020; 0.19 | 0.015   | 1910 |
|                                                | sensitivity analyses:                                     |        |             |         |      |
| 2                                              | socioeconomic model                                       | 0.10   | 0.018; 0.19 | 0.017   | 1910 |
| 3                                              | cardiovascular model                                      | 0.10   | 0.020; 0.19 | 0.015   | 1910 |
| 4                                              | full model                                                | 0.10   | 0.019; 0.19 | 0.016   | 1910 |
|                                                | the role of APOE $\epsilon 4$ :                           |        |             |         |      |
| 5                                              | base model with APOE $\epsilon 4$                         | 0.11   | 0.026; 0.20 | 0.010   | 1861 |
| 6                                              | full model with APOE $\epsilon 4$                         | 0.11   | 0.027; 0.20 | 0.0098  | 1861 |
| 7                                              | base model with APOE $\epsilon 4$ – rs3747742 interaction | -0.067 | -0.24; 0.10 | 0.44    | 1861 |

Supplementary Table S5. Summarised information on three SNPs which are in linkage disequilibrium with the TREML2 missense variant rs3747742. MAF – minor allele frequency. The major and minor alleles are A and C for rs9357347, C and T for rs9381040, and C and T for rs6916710.

|                            | rs9357347    |              | rs9381040    |              | rs6916710    |              |
|----------------------------|--------------|--------------|--------------|--------------|--------------|--------------|
|                            | TREND-Batch1 | TREND-Batch2 | TREND-Batch1 | TREND-Batch2 | TREND-Batch1 | TREND-Batch2 |
| method                     | imputed      | imputed      | genotyped    | genotyped    | imputed      | imputed      |
| imputation quality         | 0.99         | 0.99         | -----        | -----        | 1.00         | 0.99         |
| MAF                        | 0.34         | 0.33         | 0.33         | 0.32         | 0.39         | 0.38         |
| correlation with rs3747742 | 0.82         | 0.85         | 0.85         | 0.89         | 0.87         | 0.86         |

Supplementary Table S6. Neither rs3747742 nor rs9357347, rs9381040 and rs6916710, which are in linkage disequilibrium with rs3747742 are significantly associated with WMH volume in our dataset.

|                                   | effect | 95% CI       | p-value | N    |
|-----------------------------------|--------|--------------|---------|------|
| base model WMH volume ~ rs3747742 | -0.082 | -0.23; 0.070 | 0.29    | 1935 |
| base model WMH volume ~ rs9357347 | -0.069 | -0.22; 0.082 | 0.37    | 1935 |
| base model WMH volume ~ rs9381040 | -0.098 | -0.25; 0.054 | 0.20    | 1935 |
| base model WMH volume ~ rs6916710 | -0.085 | -0.23; 0.061 | 0.25    | 1935 |

Supplementary Table S7. The candidate SNPs rs9357347 (see 2) and rs9381040 (see 3) show almost the same association pattern with the AD score as rs3747742 (see 1). When including one of the candidate SNPs together with rs3747742 neither of them is significantly associated with the AD score anymore. The candidate SNP rs6916710 (see 4) is not significantly associated with the AD score, and when included together with rs3747742 the association between the missense variant and the AD score remains significant.

|                                   | effect | 95% CI      | p-value | N    |
|-----------------------------------|--------|-------------|---------|------|
| 1 base model AD score ~ rs3747742 | 0.10   | 0.020; 0.19 | 0.015   | 1910 |

|   |                                             |       |              |       |      |
|---|---------------------------------------------|-------|--------------|-------|------|
|   | full model AD score ~ rs3747742             | 0.10  | 0.019; 0.19  | 0.016 | 1910 |
| 2 | base model AD score ~ rs9357347             | 0.11  | 0.023; 0.19  | 0.013 | 1910 |
|   | full model AD score ~ rs9357347             | 0.11  | 0.023; 0.19  | 0.012 | 1910 |
|   | base model AD score ~ rs3747742 + rs9357347 |       |              |       | 1910 |
|   | rs3747742                                   | 0.049 | -0.10; 0.20  | 0.53  |      |
|   | rs9357347                                   | 0.067 | -0.085; 0.22 | 0.39  |      |
| 3 | base model AD score ~ rs9381040             | 0.11  | 0.021; 0.19  | 0.015 | 1910 |
|   | full model AD score ~ rs9381040             | 0.11  | 0.021; 0.19  | 0.015 | 1910 |
|   | base model AD score ~ rs3747742 + rs9381040 |       |              |       | 1910 |
|   | rs3747742                                   | 0.052 | -0.12; 0.22  | 0.55  |      |
|   | rs9381040                                   | 0.060 | -0.11; 0.23  | 0.50  |      |
| 4 | base model AD score ~ rs6916710             | 0.056 | -0.025; 0.14 | 0.18  | 1910 |
|   | full model AD score ~ rs6916710             | 0.058 | -0.023; 0.14 | 0.16  | 1910 |
|   | base model AD score ~ rs3747742 + rs6916710 |       |              |       | 1910 |
|   | rs3747742                                   | 0.22  | 0.047; 0.38  | 0.012 |      |
|   | rs6916710                                   | -0.12 | -0.28; 0.042 | 0.15  |      |

## References

- [1] S. E. Baumeister, D. Alte, C. Meyer, and U. John, 'Riskanter Alkoholkonsum und alkoholbezogene Störungen in Vorpommern: Die Studie „Leben und Gesundheit in Vorpommern“ (SHIP) und der Bundesgesundheitssurvey 1998 im Vergleich', *Gesundheitswesen*, vol. 67, no. 01, pp. 39–47, Jan. 2005, doi: 10.1055/s-2004-813829.
- [2] M. Habes *et al.*, 'Relationship between APOE genotype and structural MRI measures throughout adulthood in the Study of Health in Pomerania population-based cohort', *Am. J. Neuroradiol.*, vol. 37, no. 9, pp. 1636–1642, Sep. 2016, doi: 10.3174/ajnr.A4805.
